# Supplementary material for: Geochemical zones and environmental gradients for soils from the Central Transantarctic Mountains, Antarctica
Source: Copernicus journal article supplement (doi:10.5194/bg-2020-316), 2020-09-17
Supplement: Supplementary file 1 [file bg-2020-316-supplement.zip]

# Geochemical zones and environmental gradients for soils from the Central Transantarctic Mountains, Antarctica

Melisa Diaz<sup>1,2\*</sup>, Christopher B. Gardner<sup>1,2</sup>, Susan A. Welch<sup>1,2</sup>, W. Andrew Jackson<sup>3</sup>, Byron J. Adams<sup>4</sup>, Diana H. Wall<sup>5</sup>, Ian D. Hogg<sup>6,7</sup>, Noah Fierer<sup>8</sup>, W. Berry Lyons<sup>1,2</sup>

<sup>1</sup>School of Earth Sciences, The Ohio State University, Columbus, OH, USA

<sup>2</sup>Byrd Polar and Climate Research Center, The Ohio State University, Columbus, OH, USA

<sup>3</sup>Department of Civil, Environmental, & Construction Engineering, Texas Tech University, Lubbock, TX, USA

<sup>4</sup>Department of Biology, Evolutionary Ecology Laboratories, and Monte L. Bean Museum, Brigham Young University, Provo, UT, USA

<sup>5</sup>Department of Biology and School of Global Environmental Sustainability, Colorado State University, Fort Collins, CO, USA

<sup>6</sup>Canadian High Arctic Research Station, Polar Knowledge Canada, Cambridge Bay, Nunavut, Canada

<sup>7</sup>School of Science, University of Waikato, Hamilton, New Zealand

<sup>8</sup>Department of Ecology and Evolutionary Biology and Cooperative Institute for Research in Environmental Science, University of Colorado Boulder, Boulder, CO, USA

*Correspondence to:* Melisa A. Diaz ([diaz.237@osu.edu](mailto:diaz.237@osu.edu))

18 **Supplementary materials:**  
19

20 **Figure S1:** Images of black lichen (a), green lichen (b), collembola (c), and multiple lichen species (d) at Mt. Speed and Mt.  
21 Wasko.  
22

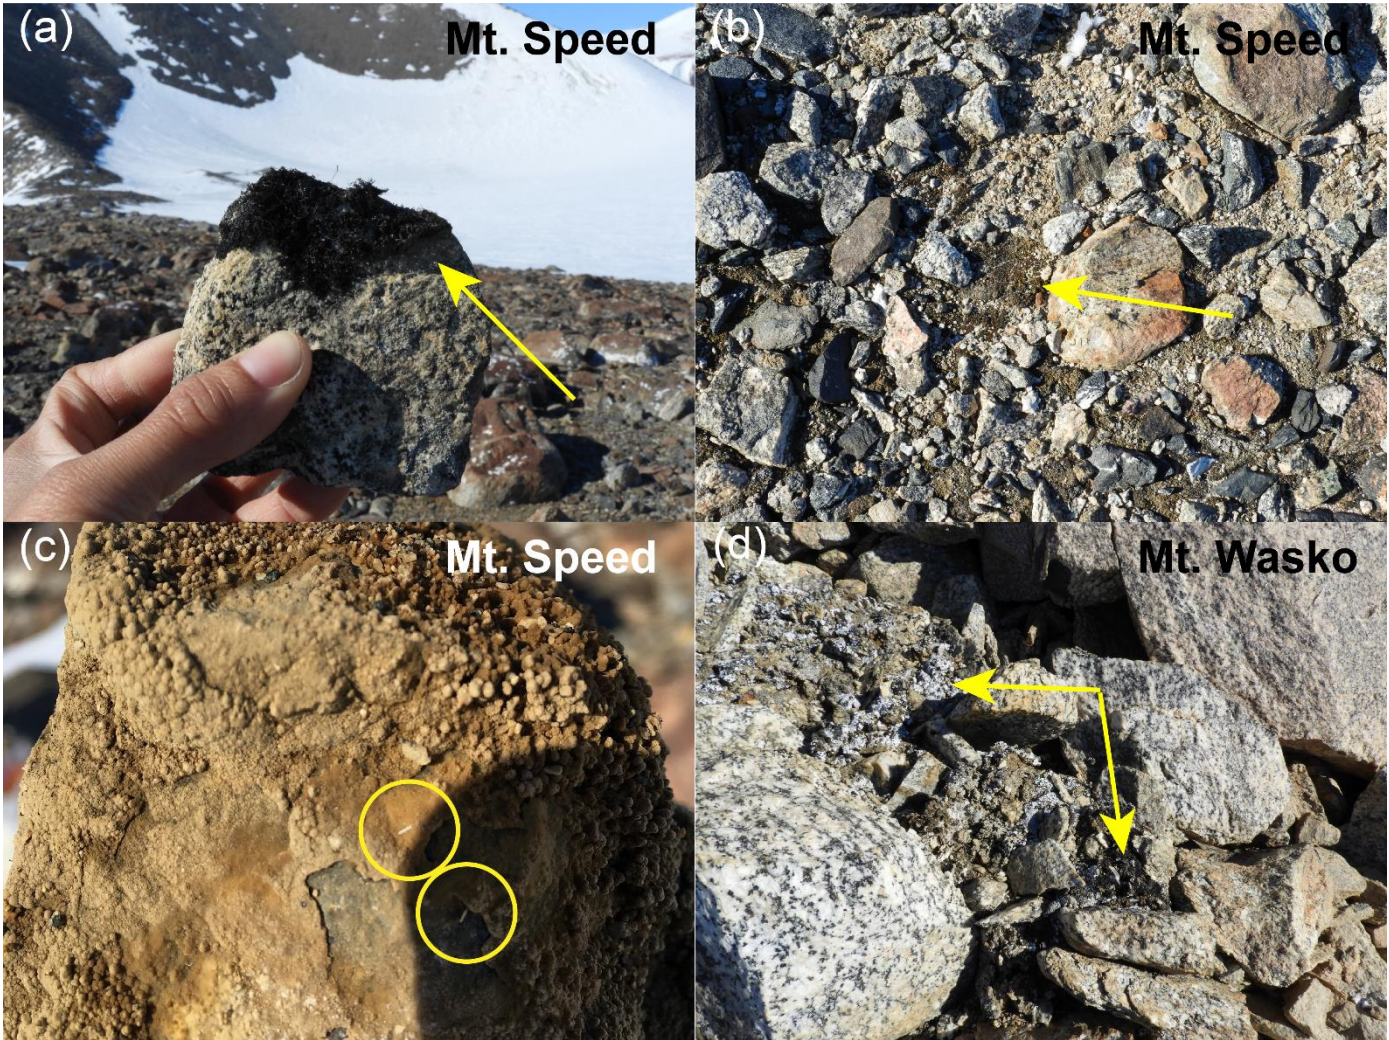

23

|    |                                                                                   |
|----|-----------------------------------------------------------------------------------|
| 24 | <b>Table S1:</b> Analytical precision and accuracy for water-soluble salts.       |
| 25 |                                                                                   |
| 26 | <b>Table S2:</b> Water-soluble ion concentrations from 1:5 soil to water leaches. |
| 27 |                                                                                   |
| 28 | <b>Table S3:</b> Random forest model imputed training dataset (RFSalts_Train).    |
| 29 |                                                                                   |
| 30 | <b>Table S4:</b> Random forest model imputed testing dataset (RFSalts_Test).      |
